# Supplementary material for: Surfactant-free 2D/2D Pd/g-C3N4 for enhanced photocatalytic CO2 reduction
Source: Royal Society of Chemistry journal article supplement (doi:10.1039/d3cy01623d), 2024-01-01
Supplement: d3cy01623d1.pdf [file d3cy01623d1.pdf]

## Supporting Information

Surfactant-free 2D/2D Pd/g-C<sub>3</sub>N<sub>4</sub> for enhanced photocatalytic CO<sub>2</sub> reduction

Zhijun Huang,<sup>\*a</sup> Jie Wu,<sup>a</sup> Chunliang Yang,<sup>b</sup> Fengwen Yan,<sup>\*a</sup> Guoqing Yuan<sup>a</sup>

<sup>a</sup>Beijing National Laboratory of Molecular Sciences, Key Laboratory of Green  
Printing, Institute of Chemistry, Chinese Academy of Sciences, Beijing 100190, P.R.  
China

<sup>b</sup>Ningbo Kingfa Advanced Material Co., Ltd., Ningbo, Zhejiang, 315803, P.R. China

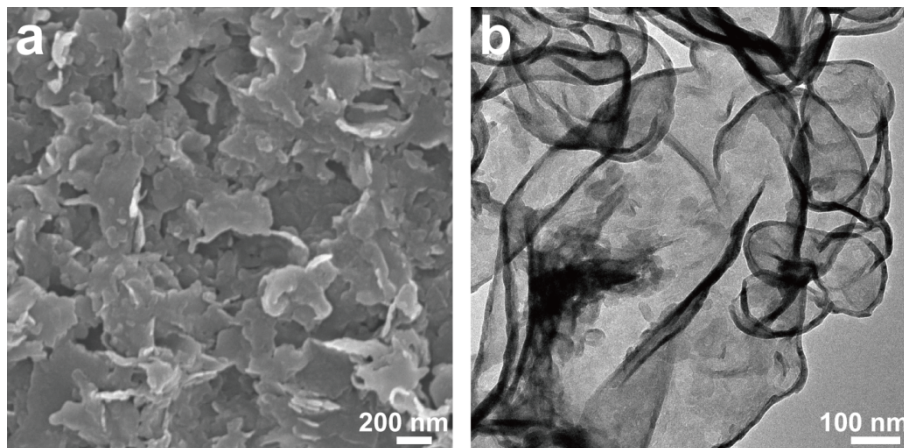

**Fig. S1** a) SEM and b) TEM images of CN obtained by heating urea at 550 °C.

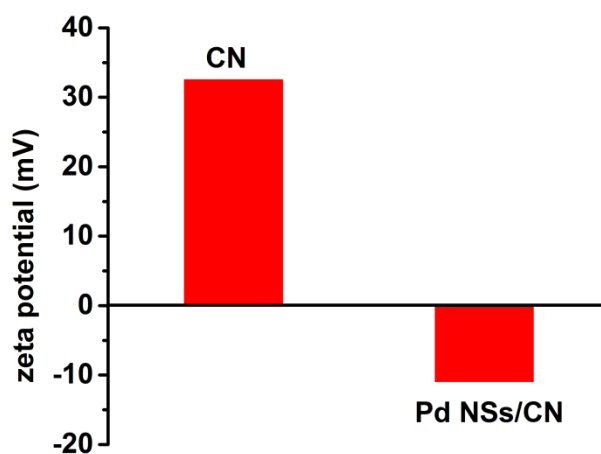

**Fig. S2** Zeta potential of CN and Pd NSs/CN-50.

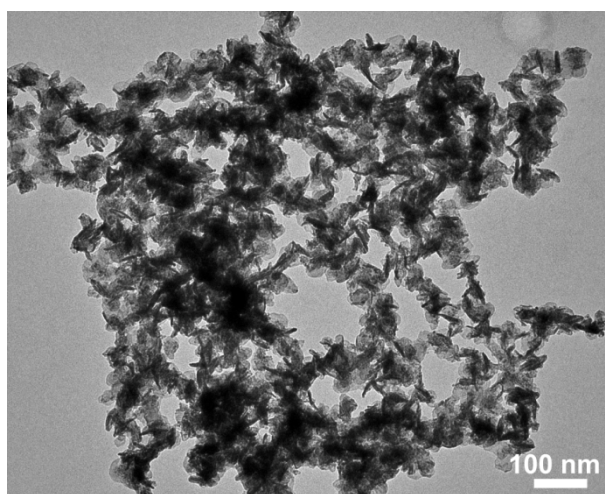

**Fig. S3** TEM image of agglomerated Pd NSs prepared from  $\text{Na}_2\text{PdCl}_4$  using CO as the reducing agent without the addition of CN.

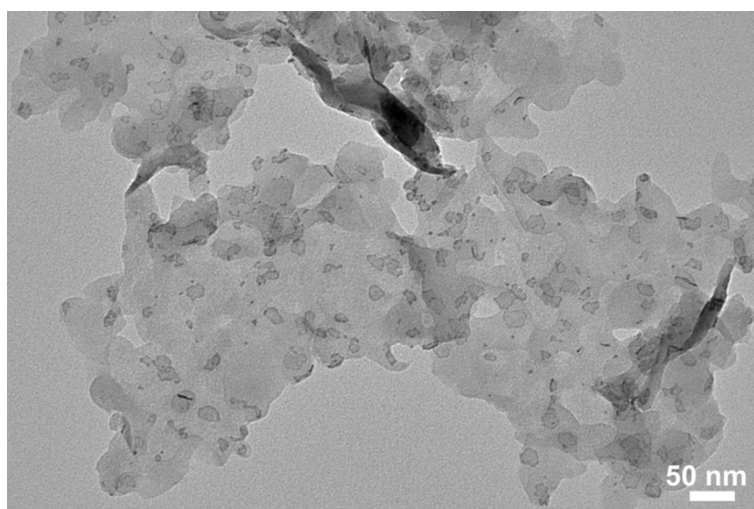

**Fig. S4** TEM image of Pd NSs/CN prepared from  $\text{Na}_2\text{PdCl}_4$  and CN using CO as the reducing agent under stirring.

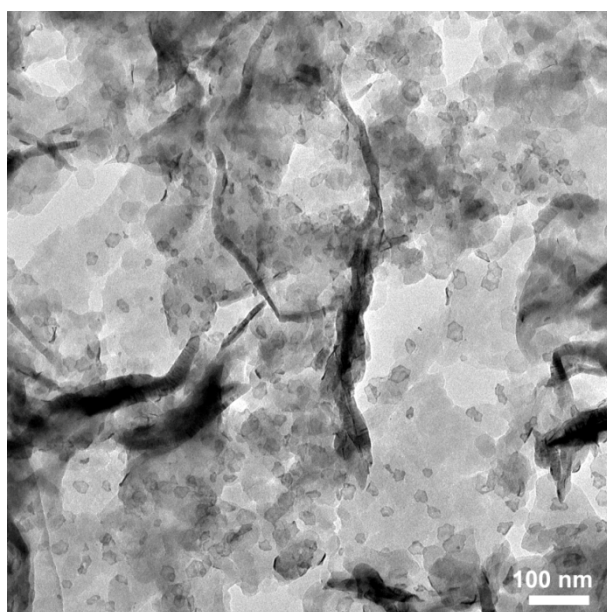

**Fig. S5** TEM image of PVP-Pd NSs/CN.

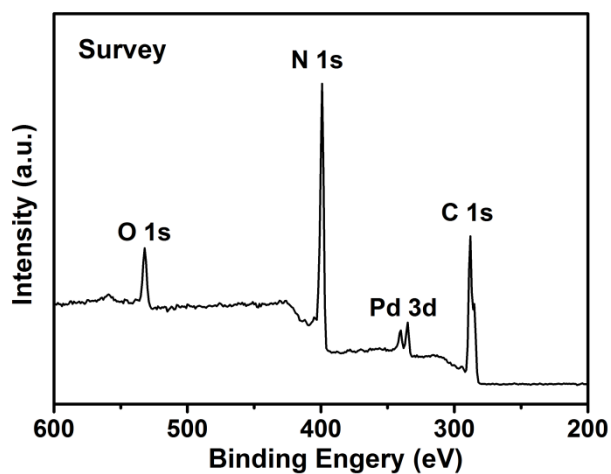

**Fig. S6** a) XPS survey spectrum of PVP-Pd NSs/CN.

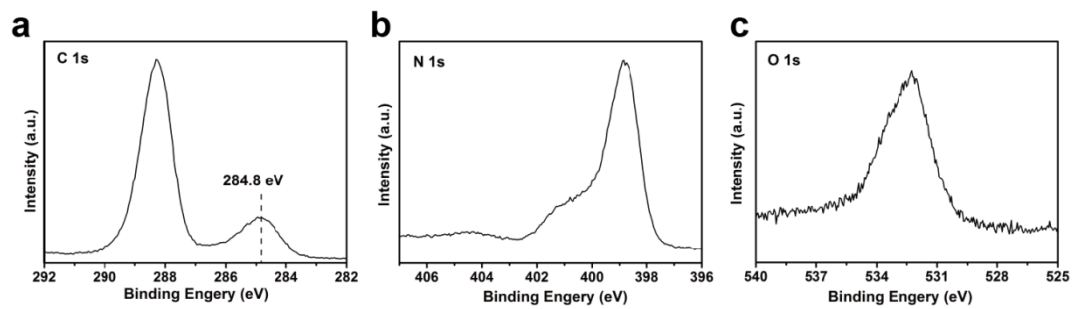

**Fig. S7** a) C 1s, b) N 1s, and c) O 1s XPS spectra of Pd NSs/CN.

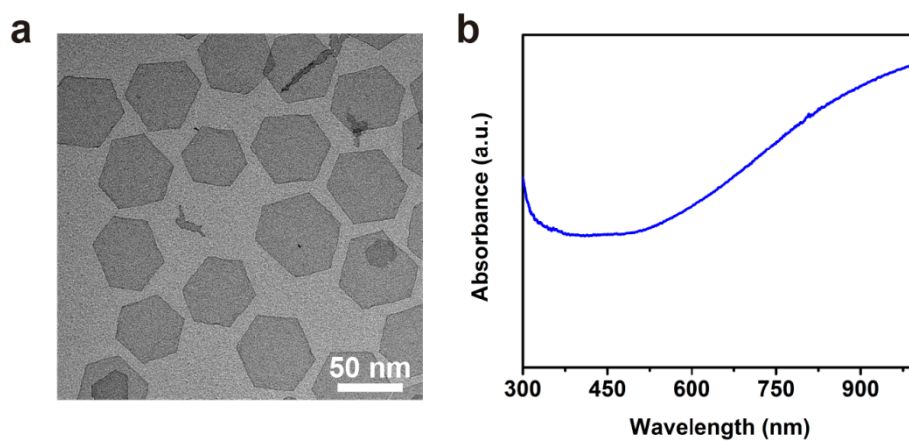

**Fig. S8** a) TEM image and b) UV-vis-NIR diffuse reflection spectrum of Pd NSs.

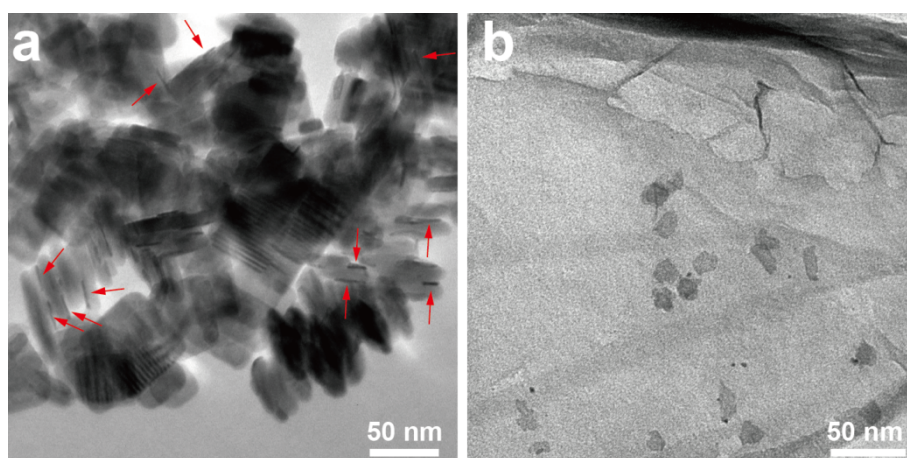

**Fig. S9** TEM images of a) Pd NSs/TiO<sub>2</sub> nanoplates and b) Pd NSs/GO.

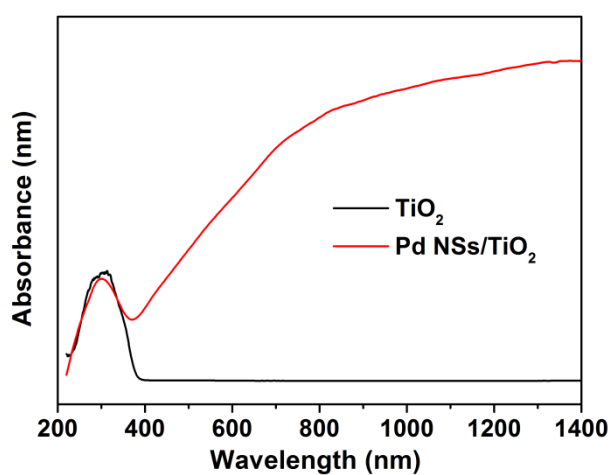

**Fig. S10** UV-vis-NIR diffuse reflection spectra of TiO<sub>2</sub> nanoplates and Pd NSs/TiO<sub>2</sub>.
